# Supplementary material for: The sexually driven epidemic in youths in China’s southwestern border region was caused by dynamic emerging multiple recombinant HIV-1 strains
Source: PubMed Central journal article supplement (PMC4489098; doi:10.1038/srep11323), 2015-07-02
Supplement: srep11323-s1.pdf [file srep11323-s1.pdf]

**The sexually driven epidemic in youths in China's southwestern border region was caused by dynamic emerging multiple recombinant HIV-1 strains**

Huamian Wei<sup>1\*</sup>, Hui Xing<sup>1\*</sup>, Jenny H. Hsi<sup>1\*</sup>, Manhong Jia<sup>2\*</sup>, Yi Feng<sup>1</sup>, Song Duan<sup>3</sup>, Cui He<sup>1</sup>, Shitang Yao<sup>3</sup>, Yuhua Ruan<sup>1</sup>, Xiang He<sup>4</sup>, Lingjie Liao<sup>1</sup>, Yanling Ma<sup>2</sup>, Yunda Huang<sup>5</sup>, Lin Lu<sup>2</sup>, Yiming Shao<sup>1#</sup>

1. State Key Laboratory for Infectious Disease Prevention and Control, Collaborative Innovation Center for Diagnosis and Treatment of Infectious Diseases, National Center for AIDS/STD Control and Prevention, Chinese Center for Disease Control and Prevention, Beijing, China
2. Yunnan Center for Disease Control and Prevention, Kunming, Yunnan, China
3. Dehong Center for Disease Control and Prevention, Dehong, Yunnan, China
4. Guangdong Provincial Institute of Public Health, Guangdong, China
5. Fred Hutchinson Cancer Research Center, Seattle, USA

\* Joint first authors

# Correspondence should be addressed to:

Yiming Shao, PhD, MD

State Key Laboratory for Infectious Disease Prevention and Control and National Center for AIDS/STD Control and Prevention, Chinese Center for Disease Control and Prevention,  
155 Changbai Road Changping District, Beijing 102206, China.

Email: [yshao08@gmail.com](mailto:yshao08@gmail.com)

**Supplemental Table S1.** The subtype list of each sequence. The segment of *pol* (HXB2:2242-3450), *gag* (790-1862) and near full-length genome was amplified. The subtype was identified by phylogenetic trees, Recombinant Identification Program (RIP) and Simplot software.

| Patient ID | Subtype    |            |      | Integrated Subtype* |
|------------|------------|------------|------|---------------------|
|            | <i>pol</i> | <i>gag</i> | NFLG |                     |
| DH09JJX01  | C          | N/A        | N/A  | BC_pCRF2            |
| DH09JJX02  | BC         | N/A        | N/A  | 01BC_pCRF7          |
| DH09JJX03  | B          | N/A        | N/A  | B                   |
| DH09JJX04  | BC         | N/A        | N/A  | BC_pCRF11           |
| DH09JJX05  | CRF01_AE   | N/A        | N/A  | CRF01_AE            |
| DH09JJX06  | BC         | N/A        | N/A  | BC                  |
| DH09JJX07  | BC         | N/A        | N/A  | BC_pCRF3            |
| DH09JJX08  | BC         | N/A        | N/A  | BC                  |
| DH09JJX09  | BC         | BC         | N/A  | BC                  |
| DH09JJX10  | CRF08_BC   | N/A        | N/A  | CRF08_BC            |
| DH09JJX11  | BC         | N/A        | N/A  | BC                  |
| DH09JJX12  | C          | C          | N/A  | C                   |
| DH09JJX13  | BC         | N/A        | N/A  | BC_pCRF3            |
| DH09JJX14  | C          | 01BC       | N/A  | 01BC                |
| DH09JJX15  | 01BC       | C          | N/A  | 01BC                |
| DH09JJX16  | BC         | N/A        | N/A  | BC                  |
| DH09JJX17  | C          | N/A        | N/A  | BC_pCRF5            |
| DH09JJX18  | C          | N/A        | N/A  | BC_pCRF2            |
| DH09JJX19  | C          | N/A        | N/A  | 01BC_pCRF4          |
| DH09JJX20  | C          | 01BC       | 01BC | 01BC_pCRF4          |
| DH09JJX21  | BC         | BC         | BC   | BC                  |
| DH09JJX22  | C          | C          | C    | C                   |
| DH09JJX23  | C          | C          | N/A  | C                   |
| DH09JJX24  | BC         | BC         | N/A  | BC_pCRF3            |
| DH09JJX25  | C          | BC         | N/A  | C                   |
| DH09JJX26  | B          | N/A        | N/A  | B                   |
| DH09JJX27  | B          | N/A        | N/A  | B                   |
| DH09JJX28  | CRF01_AE   | N/A        | N/A  | CRF01_AE            |
| DH09JJX29  | CRF01_AE   | N/A        | N/A  | CRF01_AE            |
| DH09JJX30  | BC         | N/A        | N/A  | 01BC_pCRF10         |
| DH09JJX31  | C          | C          | BC   | BC_pCRF5            |
| DH09JJX32  | BC         | AE         | N/A  | 01BC                |
| DH09JJX33  | CRF01_AE   | N/A        | N/A  | CRF01_AE            |
| DH09JJX34  | 01B        | N/A        | N/A  | 01B                 |
| DH09JJX35  | C          | BC         | N/A  | 01BC_pCRF4          |
| DH09JJX36  | BC         | BC         | N/A  | BC                  |
| DH09JJX37  | CRF01_AE   | N/A        | N/A  | CRF01_AE            |
| DH09JJX38  | CRF08_BC   | N/A        | N/A  | CRF08_BC            |

| Patient ID | Subtype    |            |      | Integrated Subtype* |
|------------|------------|------------|------|---------------------|
|            | <i>pol</i> | <i>gag</i> | NFLG |                     |
| DH09JJX39  | C          | BC         | N/A  | C                   |
| DH09JJX40  | BC         | N/A        | N/A  | BC_pCRF3            |
| DH09JJX41  | C          | C          | C    | C                   |
| DH09JJX42  | BC         | BC         | N/A  | BC_pCRF3            |
| DH09JJX43  | BC         | N/A        | N/A  | BC_pCRF3            |
| DH09JJX44  | B          | N/A        | N/A  | B                   |
| DH09JJX45  | C          | N/A        | N/A  | C                   |
| DH09JJX46  | BC         | BC         | BC   | BC_pCRF3            |
| DH09JJX47  | CRF07_BC   | N/A        | N/A  | CRF07_BC            |
| DH09JJX48  | CRF01_AE   | N/A        | N/A  | CRF01_AE            |
| DH09JJX49  | BC         | N/A        | N/A  | BC                  |
| DH09JJX50  | C          | 01BC       | N/A  | 01BC_pCRF4          |
| DH09JJX51  | C          | N/A        | N/A  | C                   |
| DH09JJX52  | CRF08_BC   | N/A        | N/A  | CRF08_BC            |
| DH09JJX53  | BC         | N/A        | N/A  | BC_pCRF8            |
| DH09JJX54  | BC         | N/A        | N/A  | BC_pCRF3            |
| DH10JJX01  | BC         | N/A        | N/A  | 01BC_pCRF1          |
| DH10JJX02  | CRF01_AE   | AE         | AE   | CRF01_AE            |
| DH10JJX03  | CRF01_AE   | N/A        | N/A  | CRF01_AE            |
| DH10JJX04  | BC         | BC         | N/A  | BC                  |
| DH10JJX05  | CRF08_BC   | CRF08_BC   | N/A  | CRF08_BC            |
| DH10JJX06  | CRF01_AE   | N/A        | N/A  | CRF01_AE            |
| DH10JJX07  | BC         | BC         | N/A  | BC                  |
| DH10JJX08  | BC         | 01C        | 01BC | 01BC_pCRF10         |
| DH10JJX09  | BC         | C          | BC   | BC                  |
| DH10JJX10  | 01C        | N/A        | N/A  | 01C                 |
| DH10JJX11  | C          | C          | N/A  | C                   |
| DH10JJX12  | BC         | AE         | N/A  | 01BC                |
| DH10JJX13  | CRF01_AE   | N/A        | N/A  | CRF01_AE            |
| DH10JJX14  | BC         | N/A        | N/A  | BC_pCRF3            |
| DH10JJX15  | CRF01_AE   | N/A        | N/A  | CRF01_AE            |
| DH10JJX16  | C          | N/A        | N/A  | C                   |
| DH10JJX17  | CRF08_BC   | N/A        | N/A  | CRF08_BC            |
| DH10JJX18  | C          | 01BC       | 01BC | 01BC_pCRF4          |
| DH10JJX19  | BC         | N/A        | N/A  | BC                  |
| DH10JJX20  | BC         | N/A        | N/A  | BC                  |
| DH10JJX21  | C          | N/A        | N/A  | C                   |
| DH10JJX22  | CRF08_BC   | N/A        | N/A  | CRF08_BC            |
| DH10JJX23  | CRF01_AE   | N/A        | N/A  | CRF01_AE            |
| DH10JJX24  | BC         | N/A        | N/A  | BC_pCRF3            |
| DH10JJX25  | 01BC       | BC         | 01BC | 01BC                |
| DH10JJX26  | BC         | BC         | BC   | BC_pCRF3            |

| Patient ID | Subtype    |            |      | Integrated Subtype* |
|------------|------------|------------|------|---------------------|
|            | <i>pol</i> | <i>gag</i> | NFLG |                     |
| DH10JJX27  | CRF01_AE   | AE         | AE   | CRF01_AE            |
| DH10JJX28  | C          | N/A        | N/A  | C                   |
| DH10JJX29  | C          | 01BC       | 01BC | 01BC_pCRF4          |
| DH10JJX30  | CRF08_BC   | N/A        | N/A  | CRF08_BC            |
| DH10JJX31  | BC         | C          | N/A  | BC                  |
| DH10JJX32  | BC         | BC         | N/A  | 01BC_pCRF1          |
| DH10JJX33  | B          | N/A        | N/A  | B                   |
| DH10JJX34  | C          | BC         | BC   | BC_pCRF2            |
| DH10JJX35  | 01C        | AE         | 01C  | 01C                 |
| DH10JJX36  | 01C        | N/A        | N/A  | 01C                 |
| DH10JJX37  | CRF01_AE   | N/A        | N/A  | CRF01_AE            |
| DH10JJX38  | BC         | BC         | N/A  | BC                  |
| DH10JJX39  | BC         | BC         | N/A  | BC                  |
| DH10JJX40  | BC         | BC         | N/A  | BC                  |
| DH10JJX41  | BC         | N/A        | N/A  | BC                  |
| DH10JJX42  | 01C        | AE         | N/A  | 01C                 |
| DH10JJX43  | BC         | C          | 01BC | 01BC_pCRF7          |
| DH10JJX44  | BC         | BC         | BC   | BC                  |
| DH10JJX45  | BC         | C          | BC   | BC_pCRF11           |
| DH10JJX46  | C          | N/A        | N/A  | C                   |
| DH10JJX47  | CRF07_BC   | N/A        | N/A  | CRF07_BC            |
| DH10JJX48  | BC         | N/A        | N/A  | BC_pCRF9            |
| DH10JJX49  | C          | N/A        | N/A  | C                   |
| DH11JJX01  | B          | N/A        | N/A  | B                   |
| DH11JJX02  | C          | N/A        | N/A  | BC_pCRF5            |
| DH11JJX03  | BC         | N/A        | N/A  | BC                  |
| DH11JJX04  | C          | N/A        | N/A  | 01BC_pCRF6          |
| DH11JJX05  | 01BC       | N/A        | N/A  | 01BC                |
| DH11JJX06  | BC         | 01BC       | N/A  | 01BC                |
| DH11JJX07  | BC         | C          | N/A  | BC                  |
| DH11JJX08  | CRF01_AE   | N/A        | N/A  | CRF01_AE            |
| DH11JJX09  | BC         | N/A        | N/A  | BC                  |
| DH11JJX10  | BC         | N/A        | N/A  | BC                  |
| DH11JJX11  | B          | N/A        | N/A  | B                   |
| DH11JJX12  | C          | N/A        | N/A  | C                   |
| DH11JJX13  | BC         | N/A        | N/A  | BC                  |
| DH11JJX14  | BC         | AE         | N/A  | 01BC                |
| DH11JJX15  | C          | N/A        | N/A  | C                   |
| DH11JJX16  | CRF08_BC   | N/A        | N/A  | CRF08_BC            |
| DH11JJX17  | CRF01_AE   | N/A        | N/A  | CRF01_AE            |
| DH11JJX18  | BC         | N/A        | N/A  | 01BC_pCRF10         |
| DH11JJX19  | CRF07_BC   | N/A        | N/A  | CRF07_BC            |

| Patient ID | Subtype    |            |      | Integrated Subtype* |
|------------|------------|------------|------|---------------------|
|            | <i>pol</i> | <i>gag</i> | NFLG |                     |
| DH11JJX20  | 01C        | 01BC       | N/A  | 01BC                |
| DH11JJX21  | 01C        | N/A        | N/A  | 01C                 |
| DH11JJX22  | B          | N/A        | N/A  | B                   |
| DH11JJX23  | BC         | N/A        | N/A  | BC_pCRF11           |
| DH11JJX24  | BC         | N/A        | N/A  | BC                  |
| DH11JJX25  | BC         | N/A        | N/A  | BC                  |
| DH11JJX26  | BC         | N/A        | N/A  | BC                  |
| DH11JJX27  | C          | N/A        | N/A  | C                   |
| DH11JJX28  | BC         | N/A        | N/A  | BC                  |
| DH11JJX29  | C          | N/A        | N/A  | C                   |
| DH11JJX30  | 01BC       | N/A        | N/A  | 01BC                |
| DH11JJX31  | 01BC       | N/A        | N/A  | 01BC                |
| DH11JJX32  | 01C        | N/A        | N/A  | 01C                 |
| DH11JJX33  | C          | N/A        | N/A  | 01BC_pCRF4          |
| DH11JJX34  | BC         | N/A        | N/A  | BC                  |
| DH11JJX35  | BC         | N/A        | N/A  | BC                  |
| DH11JJX36  | BC         | N/A        | N/A  | BC                  |
| DH11JJX37  | BC         | N/A        | N/A  | BC                  |
| DH11JJX38  | BC         | N/A        | N/A  | BC                  |
| DH11JJX39  | BC         | N/A        | N/A  | 01BC_pCRF7          |
| DH11JJX40  | 01C        | N/A        | N/A  | 01C                 |
| DH11JJX41  | BC         | N/A        | N/A  | BC                  |
| DH11JJX42  | BC         | N/A        | N/A  | 01BC_pCRF10         |
| DH11JJX43  | CRF01_AE   | N/A        | N/A  | CRF01_AE            |
| DH12JJX01  | 01C        | N/A        | N/A  | 01C                 |
| DH12JJX02  | CRF01_AE   | N/A        | N/A  | CRF01_AE            |
| DH12JJX03  | BC         | BC         | BC   | BC                  |
| DH12JJX04  | 01BC       | N/A        | N/A  | 01BC                |
| DH12JJX05  | BC         | BC         | BC   | BC_pCRF8            |
| DH12JJX06  | CRF01_AE   | AE         | N/A  | CRF01_AE            |
| DH12JJX07  | CRF01_AE   | AE         | N/A  | CRF01_AE            |
| DH12JJX08  | CRF01_AE   | N/A        | N/A  | CRF01_AE            |
| DH12JJX09  | BC         | N/A        | N/A  | BC_pCRF9            |
| DH12JJX10  | BC         | N/A        | N/A  | BC                  |
| DH12JJX11  | BC         | BC         | N/A  | BC                  |
| DH12JJX12  | BC         | N/A        | N/A  | 01BC_pCRF10         |
| DH12JJX13  | CRF08_BC   | N/A        | N/A  | CRF08_BC            |
| DH12JJX14  | BC         | N/A        | N/A  | BC_pCRF3            |
| DH12JJX15  | CRF08_BC   | N/A        | N/A  | CRF08_BC            |
| DH12JJX16  | CRF01_AE   | N/A        | N/A  | CRF01_AE            |
| DH12JJX17  | CRF01_AE   | AE         | N/A  | CRF01_AE            |
| DH12JJX18  | BC         | BC         | N/A  | BC_pCRF3            |

| Patient ID | Subtype    |            |      | Integrated Subtype* |
|------------|------------|------------|------|---------------------|
|            | <i>pol</i> | <i>gag</i> | NFLG |                     |
| DH12JX19   | 01C        | N/A        | N/A  | 01C                 |
| DH12JX20   | BC         | N/A        | N/A  | BC                  |
| DH12JX21   | CRF01_AE   | AE         | N/A  | CRF01_AE            |
| DH12JX22   | BC         | 01BC       | N/A  | 01BC                |
| DH12JX23   | C          | BC         | 01BC | 01BC_pCRF6          |
| DH12JX24   | C          | 01BC       | N/A  | 01BC_pCRF4          |
| DH12JX25   | BC         | N/A        | N/A  | BC                  |
| DH12JX26   | BC         | N/A        | N/A  | BC                  |
| DH12JX27   | C          | N/A        | N/A  | BC_pCRF2            |
| DH12JX28   | BC         | N/A        | N/A  | BC                  |
| DH12JX29   | C          | C          | N/A  | C                   |
| DH12JX30   | CRF01_AE   | N/A        | N/A  | CRF01_AE            |
| DH12JX31   | BC         | N/A        | N/A  | BC                  |
| DH12JX32   | CRF01_AE   | AE         | N/A  | CRF01_AE            |
| DH12JX33   | 01BC       | N/A        | N/A  | 01BC                |
| DH12JX34   | BC         | BC         | N/A  | BC                  |
| DH12JX35   | BC         | N/A        | N/A  | BC                  |
| DH12JX36   | BC         | N/A        | N/A  | BC                  |
| DH12JX37   | BC         | N/A        | N/A  | BC                  |
| DH12JX38   | C          | N/A        | N/A  | 01BC_pCRF6          |
| DH12JX39   | C          | N/A        | N/A  | C                   |
| DH12JX40   | BC         | N/A        | N/A  | BC                  |
| DH12JX41   | C          | BC         | N/A  | BC_pCRF2            |
| DH12JX42   | C          | 01B        | N/A  | 01BC_pCRF4          |
| DH12JX43   | BC         | C          | 01BC | 01BC_pCRF1          |
| DH12JX44   | BC         | AE         | N/A  | 01BC                |
| DH12JX45   | CRF01_AE   | BC         | N/A  | 01BC                |
| DH12JX46   | CRF01_AE   | N/A        | N/A  | CRF01_AE            |
| DH12JX47   | BC         | BC         | BC   | BC_pCRF9            |
| DH12JX48   | CRF01_AE   | AE         | N/A  | CRF01_AE            |
| DH12JX49   | 01B        | 01BC       | N/A  | 01BC                |
| DH12JX50   | BC         | N/A        | N/A  | BC_pCRF3            |
| DH12JX51   | BC         | N/A        | N/A  | BC                  |
| DH12JX52   | 01C        | N/A        | N/A  | 01C                 |
| DH12JX53   | C          | N/A        | N/A  | C                   |
| DH12JX54   | CRF01_AE   | N/A        | N/A  | CRF01_AE            |
| DH12JX55   | BC         | N/A        | N/A  | BC                  |
| DH12JX56   | BC         | BC         | N/A  | BC_pCRF8            |
| DH12JX57   | BC         | BC         | BC   | BC                  |
| DH12JX58   | B          | B          | N/A  | B                   |
| DH12JX59   | BC         | N/A        | N/A  | BC                  |

N/A: not available.

\* The subtype of each sequence was finally fixed according to the results of *pol*, *gag* and NFLG. The subtype of sequences in each clade, such as pCRFs, referred to the subtype of NFLG sequences in their respective clades.

**Supplemental Table S2** Chi-square analysis of factors associated with different subtype categories. The case count (n) for each category is listed, along with its percentage within that demographic group (row percentage, %). Conventional\_AE denotes CRF01\_AE. Conventional\_BC denotes B'/C subtype (B', C, CRF07\_BC, and CRF08\_BC). pCRFs\_AE, pCRFs\_BC, URFs\_AE, and URFs\_BC denote the recombinant categories that do and do not include CRF01\_AE fragments, respectively.

|                       | Conventional_AE |          | Conventional_BC |         | pCRFs_AE |         | pCRFs_BC |         | URFs_AE |         | URFs_BC |         | P value |
|-----------------------|-----------------|----------|-----------------|---------|----------|---------|----------|---------|---------|---------|---------|---------|---------|
| Total, n (%)          | 29              | (14.1 %) | 43              | (21.0%) | 23       | (11.2%) | 31       | (15.1%) | 28      | (13.7%) | 51      | (24.9%) |         |
| Year of diagnosis     |                 |          |                 |         |          |         |          |         |         |         |         |         | 0.055   |
| 2009                  | 6               | (11.1%)  | 16              | (29.6%) | 6        | (11.1%) | 14       | (25.9%) | 4       | (7.4%)  | 8       | (14.8%) |         |
| 2010                  | 8               | (16.3%)  | 12              | (24.5%) | 6        | (12.2%) | 6        | (12.2%) | 6       | (12.2%) | 11      | (22.4%) |         |
| 2011                  | 3               | (7.0%)   | 9               | (20.9%) | 5        | (11.6%) | 2        | (4.7%)  | 9       | (20.9%) | 15      | (34.9%) |         |
| 2012                  | 12              | (20.3%)  | 6               | (10.2%) | 6        | (10.2%) | 9        | (15.3%) | 9       | (15.3%) | 17      | (28.8%) |         |
| Sex                   |                 |          |                 |         |          |         |          |         |         |         |         |         | 0.154   |
| Female                | 15              | (14.4%)  | 26              | (25.0%) | 16       | (15.4%) | 12       | (11.5%) | 12      | (11.5%) | 23      | (22.1%) |         |
| Male                  | 14              | (13.9%)  | 17              | (16.8%) | 7        | (6.9%)  | 19       | (18.8%) | 16      | (15.8%) | 28      | (27.7%) |         |
| Marital status        |                 |          |                 |         |          |         |          |         |         |         |         |         | 0.331   |
| Married               | 11              | (10.8%)  | 18              | (17.6%) | 12       | (11.8%) | 19       | (18.6%) | 17      | (16.7%) | 25      | (24.5%) |         |
| Single                | 18              | (17.5%)  | 25              | (24.3%) | 11       | (10.7%) | 12       | (11.7%) | 11      | (10.7%) | 26      | (25.2%) |         |
| Ethnicity             |                 |          |                 |         |          |         |          |         |         |         |         |         | 0.001   |
| Han                   | 21              | (25.3%)  | 14              | (16.9%) | 14       | (16.9%) | 10       | (12.0%) | 11      | (13.3%) | 13      | (15.7%) |         |
| Jingpo                | 1               | (1.6%)   | 15              | (23.8%) | 3        | (4.8%)  | 16       | (25.4%) | 7       | (11.1%) | 21      | (33.3%) |         |
| Dai                   | 7               | (14.9%)  | 13              | (27.7%) | 4        | (8.5%)  | 4        | (8.5%)  | 8       | (17.0%) | 11      | (23.4%) |         |
| Other minorities      | 0               | -        | 1               | (8.3%)  | 2        | (16.7%) | 1        | (8.3%)  | 2       | (16.7%) | 6       | (50.0%) |         |
| Education level       |                 |          |                 |         |          |         |          |         |         |         |         |         | < 0.001 |
| No schooling          | 4               | (8.5%)   | 6               | (12.8%) | 2        | (4.3%)  | 5        | (10.6%) | 5       | (10.6%) | 25      | (53.2%) |         |
| Primary school        | 8               | (10.5%)  | 18              | (23.7%) | 4        | (5.3%)  | 15       | (19.7%) | 16      | (21.1%) | 15      | (19.7%) |         |
| Junior school         | 12              | (17.4%)  | 15              | (21.7%) | 14       | (20.3%) | 11       | (15.9%) | 7       | (10.1%) | 10      | (14.5%) |         |
| High school and above | 5               | (38.5%)  | 4               | (30.8%) | 3        | (23.1%) | 0        | -       | 0       | -       | 1       | (7.7%)  |         |
| Occupation            |                 |          |                 |         |          |         |          |         |         |         |         |         | 0.012   |
| Farmer                | 15              | (9.8%)   | 33              | (21.6%) | 14       | (9.2%)  | 26       | (17.0%) | 24      | (15.7%) | 41      | (26.8%) |         |
| Not farmer            | 14              | (26.9%)  | 10              | (19.2%) | 9        | (17.3%) | 5        | (9.6%)  | 4       | (7.7%)  | 10      | (19.2%) |         |



|                                  | Conventional<br>_AE |         | Conventional<br>_BC |         | pCRFs_AE |         | pCRFs_BC |         | URFs_AE |         | URFs_BC |         | P value       |
|----------------------------------|---------------------|---------|---------------------|---------|----------|---------|----------|---------|---------|---------|---------|---------|---------------|
| <b>Residence</b>                 |                     |         |                     |         |          |         |          |         |         |         |         |         | <b>0.003</b>  |
| Luxi County                      | 14                  | (16.9%) | 23                  | (27.7%) | 11       | (13.3%) | 15       | (18.1%) | 10      | (12.0%) | 10      | (12.0%) |               |
| Other Dehong county              | 7                   | (9.2%)  | 14                  | (18.4%) | 10       | (13.2%) | 13       | (17.1%) | 9       | (11.8%) | 23      | (30.3%) |               |
| Myanmar                          | 5                   | (13.9%) | 5                   | (13.9%) | 1        | (2.8%)  | 1        | (2.8)   | 6       | (16.7%) | 18      | (50.0%) |               |
| Other region in China            | 3                   | (30.0%) | 1                   | (10.0%) | 1        | (10.0%) | 2        | (20.0%) | 3       | (30.0%) | 0       | -       |               |
| <b>High-risk contact history</b> |                     |         |                     |         |          |         |          |         |         |         |         |         | <b>0.002*</b> |
| Heterosexual                     | 22                  | (15.1%) | 32                  | (21.7%) | 22       | (14.5%) | 21       | (13.8%) | 21      | (8.6%)  | 34      | (26.3%) |               |
| Injecting drug use               | 1                   | (2.5%)  | 9                   | (22.5%) | 1        | (2.5%)  | 9        | (22.5%) | 5       | (12.5%) | 15      | (37.5%) |               |
| MSM                              | 4                   | (66.7%) | 0                   | -       | 0        | -       | 0        | -       | 1       | (16.7%) | 1       | (16.7%) |               |
| Not available                    | 2                   | (28.6%) | 2                   | (28.6%) | 0        | -       | 1        | (14.3%) | 1       | (14.3%) | 1       | (14.3%) |               |

\*people without clear high risk contact history was exclude from the dataset when doing  $\chi^2$ -square analysis.

**Supplemental table S3** Chi-square analysis of factors associated with different subtype categories. The case count (n) for each category is listed, along with its percentage within that demographic group (row percentage, %). “Conventional subtypes” includes subtypes B’ and C and CRF01\_AE, CRF07\_BC, and CRF08\_BC.

|                                  | Conventional subtypes | pCRFs      | URFs       | P-value |
|----------------------------------|-----------------------|------------|------------|---------|
| Total, n (%)                     | 72 (35.1%)            | 54 (26.3%) | 79 (38.5%) |         |
| <b>Year of diagnosis</b>         |                       |            |            | 0.033   |
| 2009                             | 22 (40.7%)            | 20 (37.0%) | 12 (2.2%)  |         |
| 2010                             | 20 (40.8%)            | 12 (24.5%) | 17 (34.7%) |         |
| 2011                             | 12 (27.9%)            | 7 (16.3%)  | 24 (55.8%) |         |
| 2012                             | 18 (30.5%)            | 15 (25.4%) | 26 (44.1%) |         |
| <b>Sex</b>                       |                       |            |            | 0.295   |
| Female                           | 41 (39.4%)            | 28 (26.9%) | 35 (33.7%) |         |
| Male                             | 31 (30.7%)            | 26 (25.7%) | 44 (43.6%) |         |
| <b>Marital status</b>            |                       |            |            | 0.121   |
| Married                          | 29 (28.9%)            | 31 (30.4%) | 42 (41.2%) |         |
| Single                           | 43 (41.7%)            | 23 (22.3%) | 37 (35.9%) |         |
| <b>Ethnicity</b>                 |                       |            |            | 0.039   |
| Han                              | 35 (42.2%)            | 24 (28.9%) | 24 (28.9%) |         |
| Jingpo (minority)                | 16 (25.4%)            | 19 (30.2%) | 28 (44.4%) |         |
| Dai (minority)                   | 20 (42.6%)            | 8 (17.0%)  | 19 (40.4%) |         |
| Other (minorities)               | 1 (8.3%)              | 3 (25.0%)  | 8 (66.7%)  |         |
| <b>Education level</b>           |                       |            |            | < 0.001 |
| No schooling                     | 10 (21.3%)            | 7 (14.9%)  | 30 (63.8%) |         |
| Primary school                   | 26 (34.2%)            | 19 (25.0%) | 31 (40.8%) |         |
| Junior high school               | 27 (39.1%)            | 25 (36.2%) | 17 (24.6%) |         |
| High school and above            | 9 (69.2%)             | 3 (23.1%)  | 1 (7.7%)   |         |
| <b>Occupation</b>                |                       |            |            | 0.088   |
| Farmer                           | 48 (31.4%)            | 40 (26.1%) | 65 (42.5%) |         |
| Not farmer                       | 24 (46.2%)            | 14 (26.9%) | 14 (26.9%) |         |
| <b>Residence</b>                 |                       |            |            | 0.001   |
| Luxi County                      | 37 (44.6%)            | 26 (31.3%) | 20 (24.1%) |         |
| Other Dehong county              | 21 (27.6%)            | 23 (30.3%) | 32 (42.1%) |         |
| Myanmar                          | 10 (27.8%)            | 2 (5.6%)   | 24 (66.7%) |         |
| Other region in China            | 4 (40.0%)             | 3 (30.0%)  | 3 (30.0%)  |         |
| <b>High-risk contact history</b> |                       |            |            | 0.178*  |
| Heterosexual                     | 54 (35.5%)            | 43 (28.3%) | 55 (36.2%) |         |
| Injecting drug use               | 10 (25.0%)            | 10 (25.0%) | 20 (50.0%) |         |
| MSM                              | 4 (66.7%)             | 0 (0%)     | 2 (33.3%)  |         |
| Not available                    | 4 (57.1%)             | 2 (28.6%)  | 1 (14.3%)  |         |

\*people without clear high risk contact history was exclude from the dataset when doing  $\chi^2$ -square analysis.

**Supplemental Table S4** Multiple Logistic regression analysis of factors associated with IDU population, as compared to heterosexual group. The MSM population was excluded from analysis due to its small number of cases (n=6). P value refers to the differences between IDU and heterosexual population within each factor. P value of 0.05 or less was regarded as significant.

|                          | IDU                                        |         |                                                    |         |
|--------------------------|--------------------------------------------|---------|----------------------------------------------------|---------|
|                          | Univariate Regression<br>Crude OR (95% CI) | P value | Multivariate<br>Regression<br>Adjusted OR (95% CI) | P value |
| <b>Year of diagnosis</b> |                                            | <0.001  |                                                    | 0.014   |
| 2009                     | 1                                          |         | <b>1</b>                                           |         |
| 2010                     | 0.22 (0.05 - 1.09)                         |         | <b>0.17 (0.03 - 1.06)</b>                          |         |
| 2011                     | 1.46 (0.53 - 4.01)                         |         | <b>0.17 (0.02 - 1.06)</b>                          |         |
| 2012                     | 2.46 (0.99 - 6.12)                         |         | <b>1.96 (0.45 - 8.52)</b>                          |         |
| <b>Sex</b>               |                                            | <0.001  |                                                    | <0.001  |
| Female                   | 1                                          |         | <b>1</b>                                           |         |
| Male                     | 33.51 (7.78 - 144.3)*                      |         | <b>27.25 (5.77 - 128.6)*</b>                       |         |
| <b>Marital status</b>    |                                            | <0.001  |                                                    | 0.04    |
| Married                  | 1                                          |         | <b>1</b>                                           |         |
| Single                   | 3.44 (1.56 - 7.38)*                        |         | <b>3.05 (1.02 - 9.14)*</b>                         |         |
| <b>Ethnicity</b>         |                                            | <0.001  |                                                    | 0.005   |
| Han                      | 1                                          |         | <b>1</b>                                           |         |
| Jingpo                   | 4.20 (1.76 - 10.03)*                       |         | <b>8.65 (2.21 - 33.12)*</b>                        |         |
| Other minority           | 1.46 (0.54 - 3.95)                         |         | <b>1.89 (0.50 - 7.16)</b>                          |         |
| <b>Education level</b>   |                                            | <0.001  |                                                    |         |
| Junior and above         | 1                                          |         |                                                    |         |
| Primary and lower        | 4.35 (1.72 - 10.97)*                       |         |                                                    |         |
| <b>Occupation</b>        |                                            | <0.001  |                                                    |         |
| Farmer                   | 1                                          |         |                                                    |         |
| Not farmer               | 0.41 (0.15 - 1.13)                         |         |                                                    |         |
| <b>Residence</b>         |                                            | <0.001  |                                                    | 0.001   |
| Luxi County              | 1                                          |         | <b>1</b>                                           |         |
| Other Dehong county      | 2.27 (0.86 - 5.99)                         |         | <b>1.68 (0.45 - 6.30)</b>                          |         |
| Myanmar                  | 10.29 (3.70 - 28.6)*                       |         | <b>12.79 (2.04 - 80.12)*</b>                       |         |
| Other region in China    | 1.39 (0.15 - 12.97)                        |         | <b>2.54 (0.15 - 43.14)</b>                         |         |

\* OR greater than one for both upper and lower bound of 95% CI.

## Supplemental Figure Legends

**Supplemental Figure S1.** Bootscanning analysis of recombination in the HIV-1 *pol* gene region. Bootscanning was performed using Simplot with windows size of 120 and step size of 10. The parental reference sequences used were: subtype B, RL 42 (blue); subtype C, 95IN21068 (orange); and CRF01\_AE, CM240 (olive). All sample sequences (n=205) were subjected to analysis, but only those identified with recombinant breakpoints are shown here.

**Supplemental Figure S2.** Phylogenetic analysis on regional transmission. The 1.2 kb *pol* gene sequences of all known recombinant forms from China, India, Myanmar, Thailand, and Vietnam in the Los Alamos HIV Database were downloaded and compared to our sample sequences using neighbor-joining phylogeny with 1000 bootstrap replications. Colors denote sequences from different regions and sources. All clusters from the main phylogenetic tree containing pCRF sequences in this study were extracted and detailed displayed.

CRF07\_BC

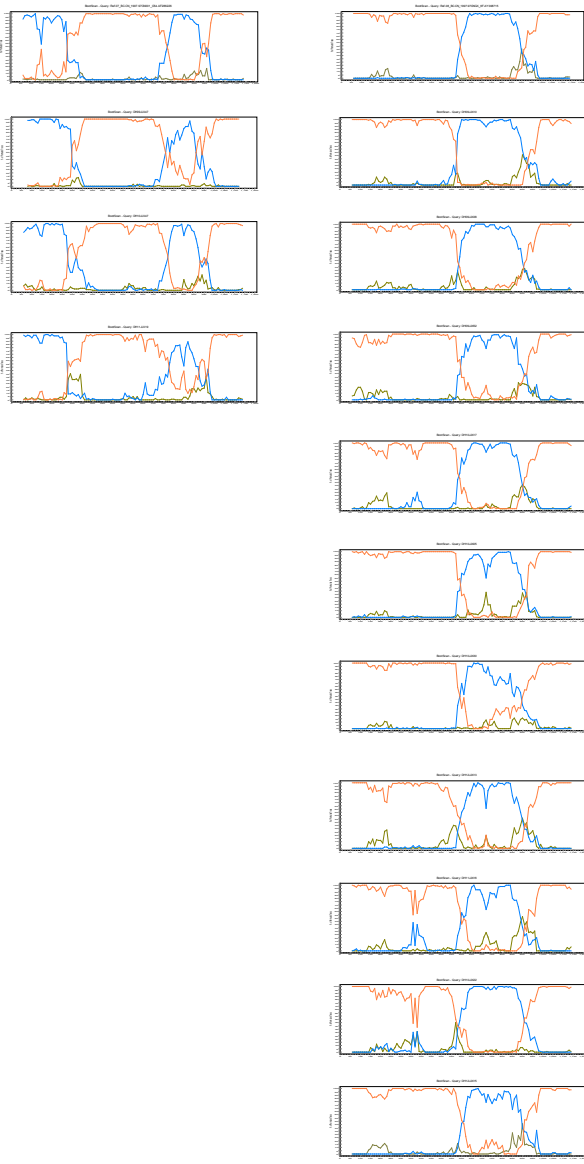

CRF08\_BC

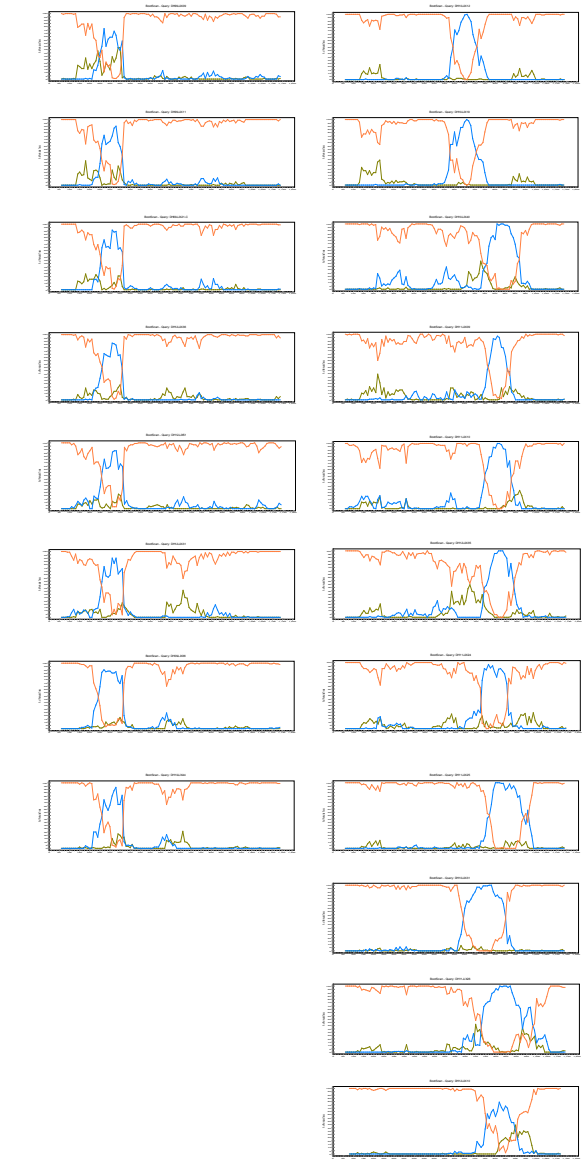

URFs

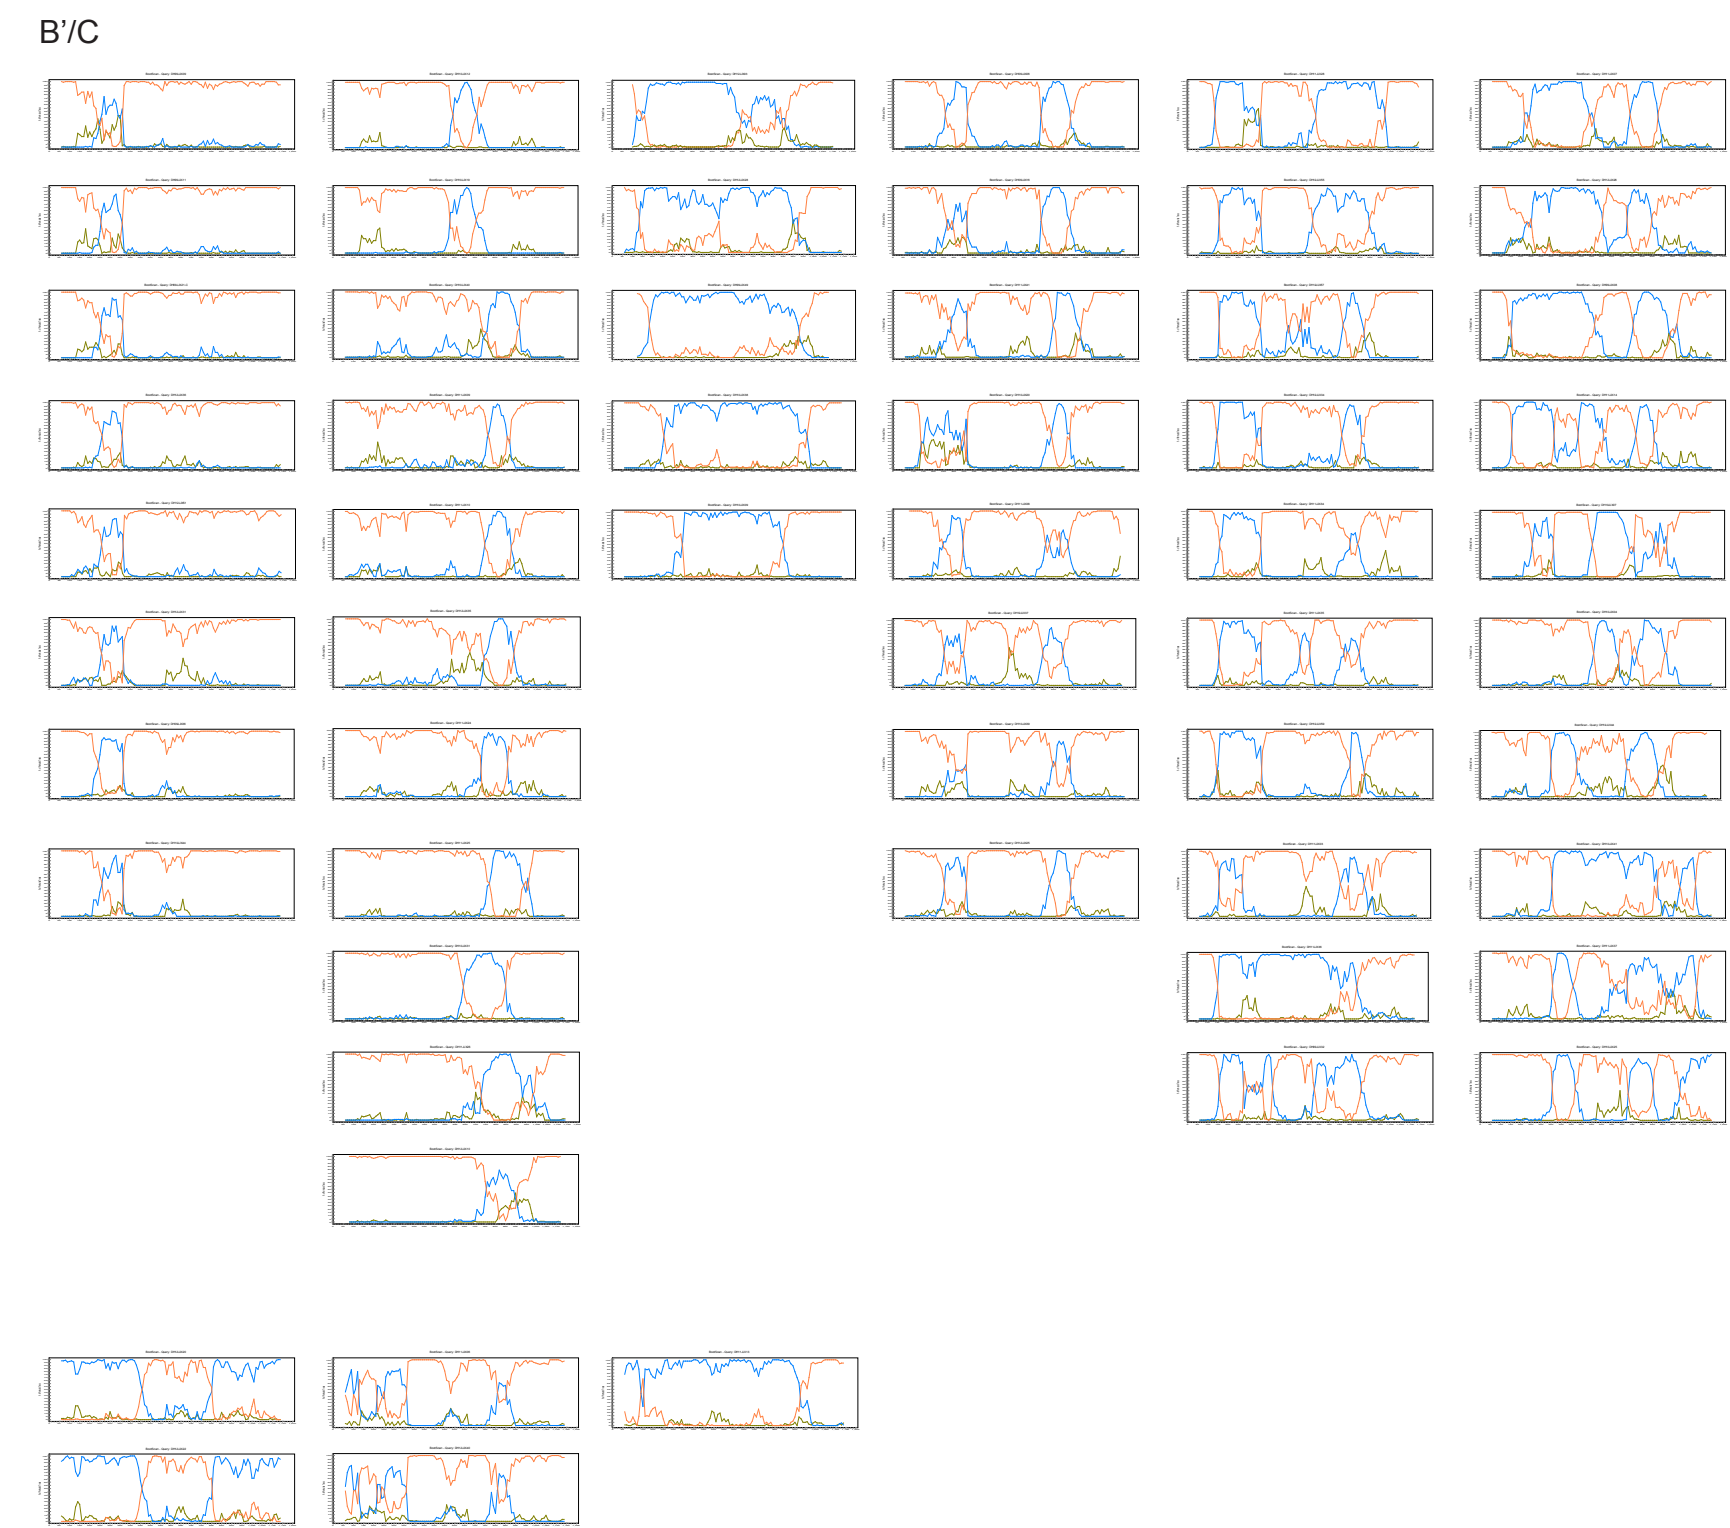

pCRFs\*

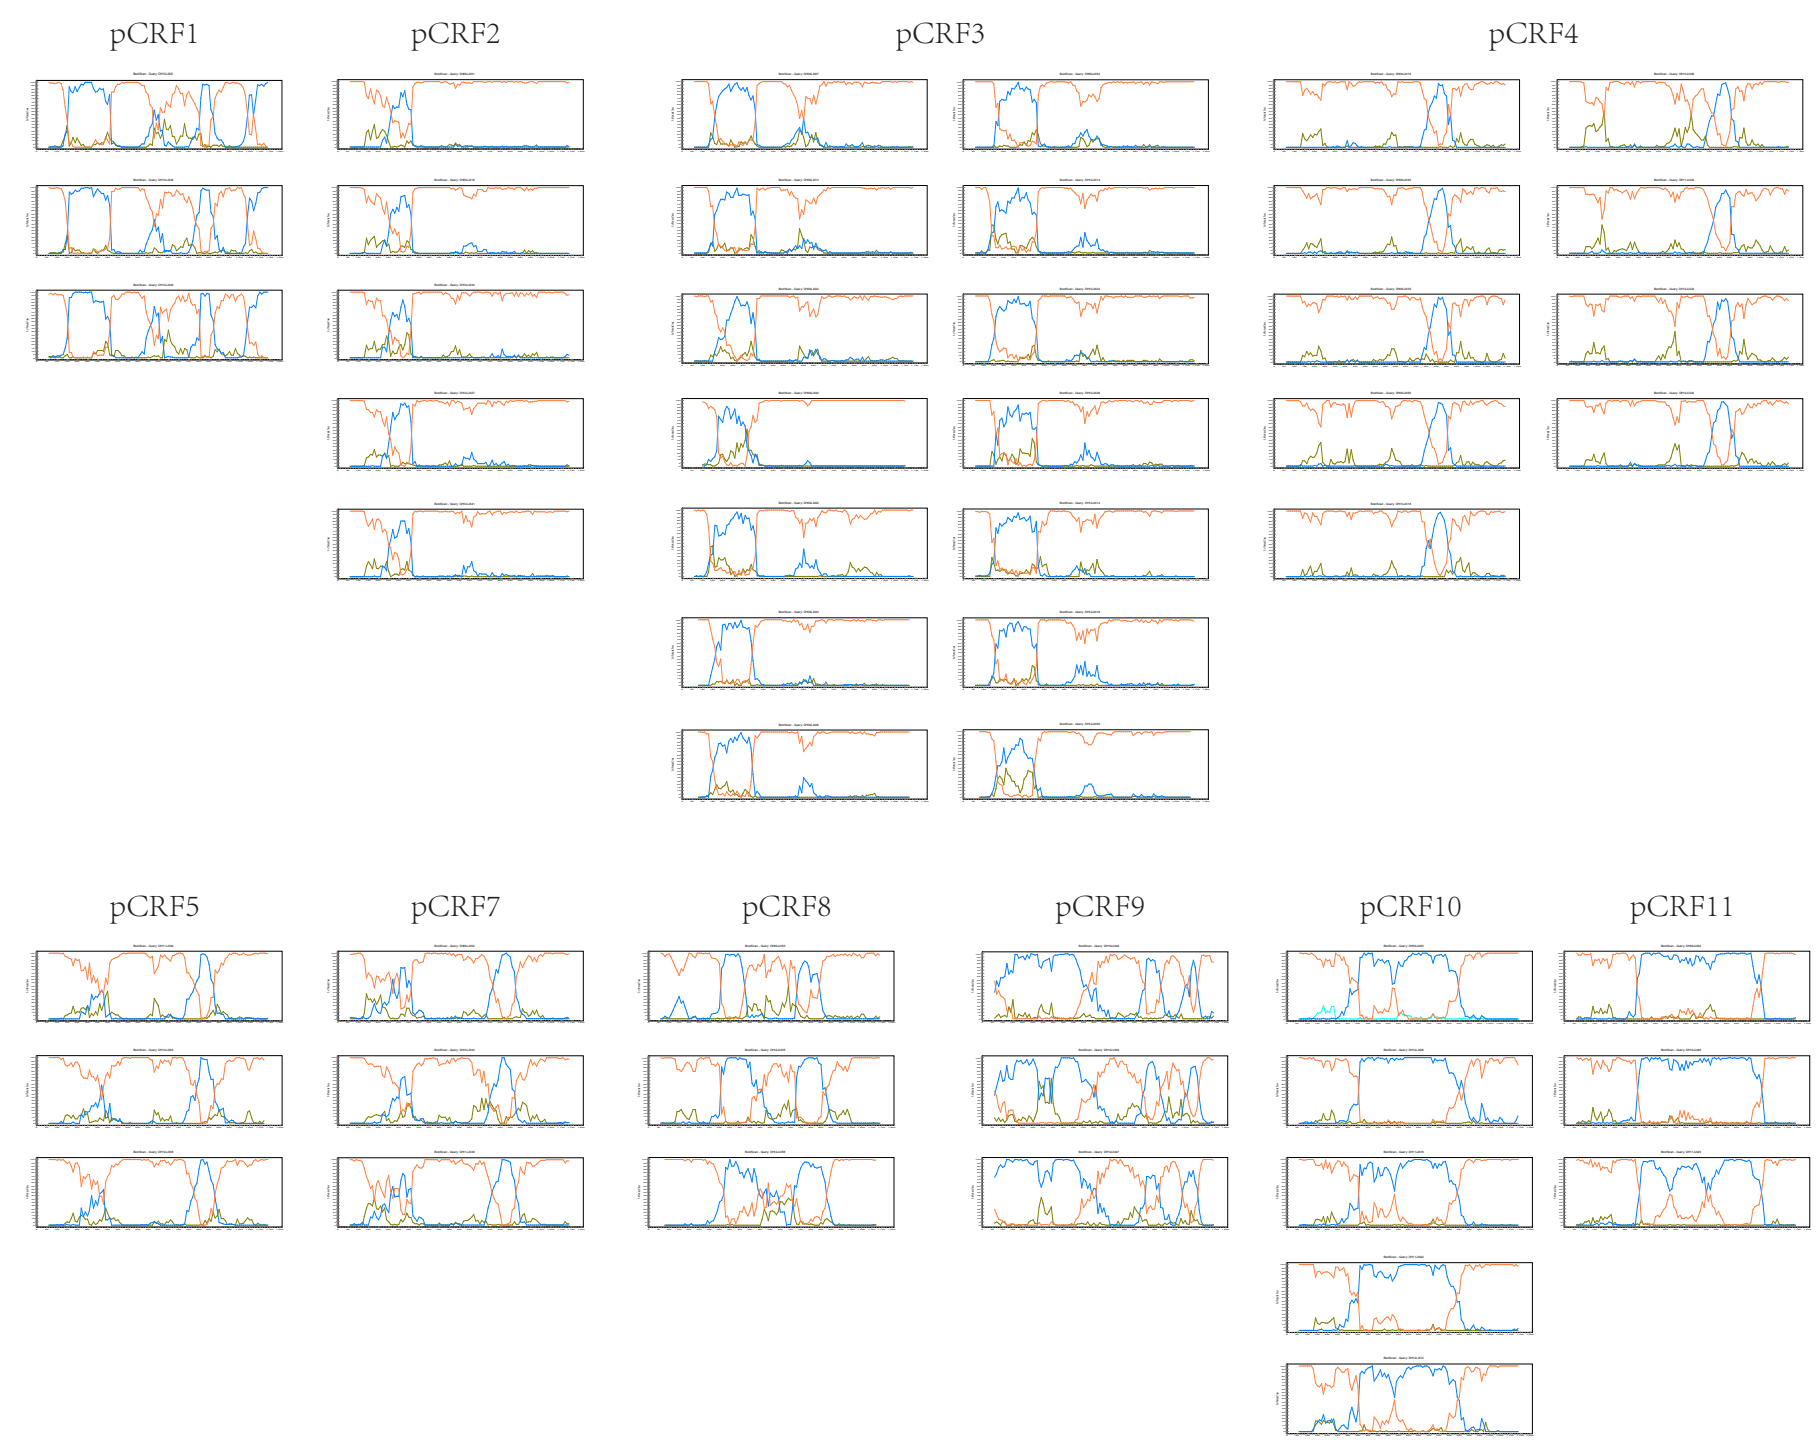

01\_AE/B'

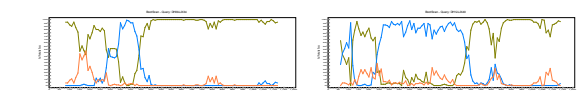

01\_AE/B/C

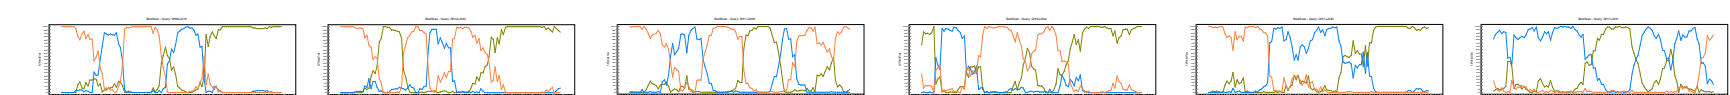

01\_AE/C

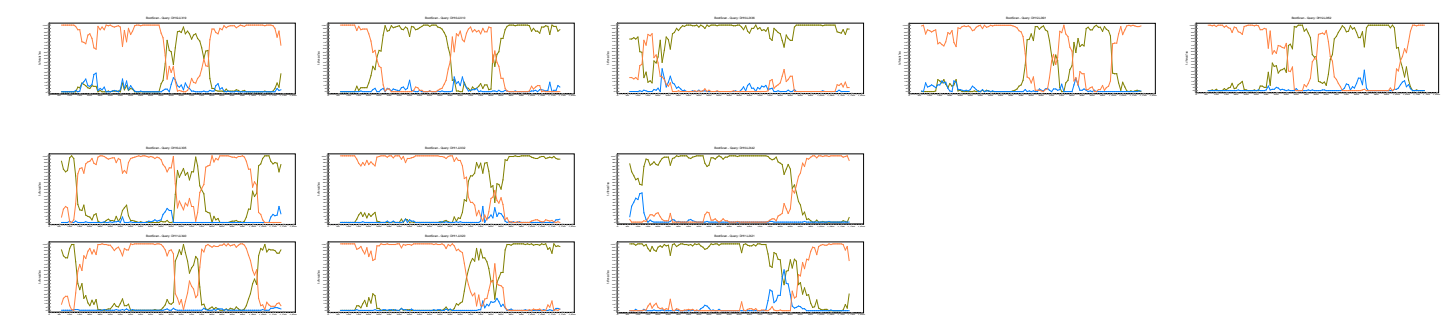

\*pCRF6 was not shown because there was no recombinant in the correspondent region,

Figure S1
